# Supplementary material
Source: Springer Nature journal article supplement (https://www.springermedizin.de/resource/supplementary/12889_2008_1436_MOESM1_ESM.pdf/9503850)

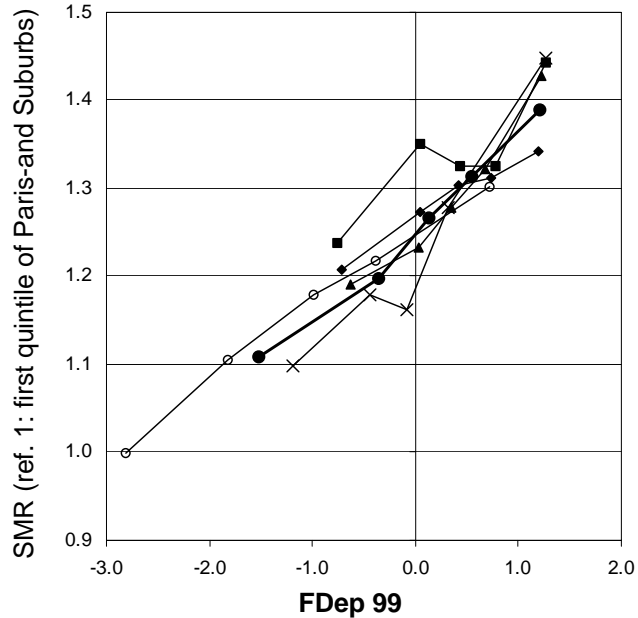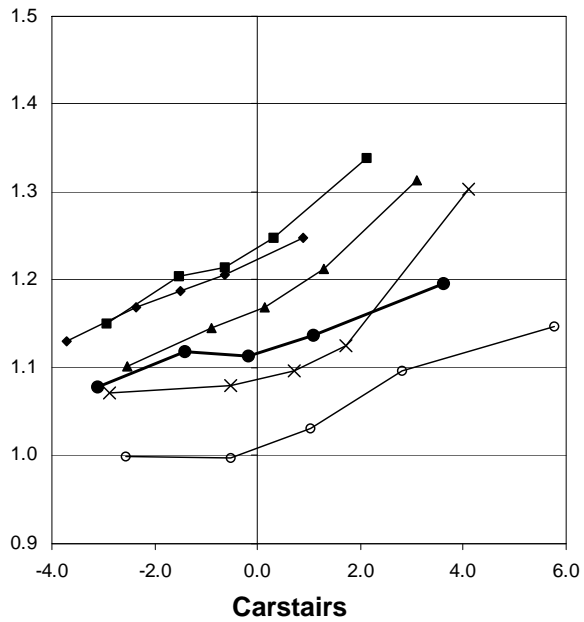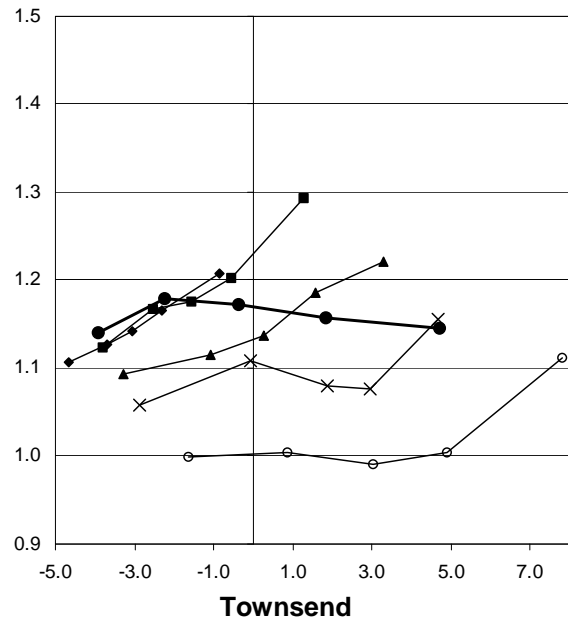

● All of France    ◆ Rural    ■ Quasi-rural    ▲ Quasi-urban    × Urban    ○ Paris-and-suburbs

Supplement: MOESM1 [file 9503850]
